# Supplementary material for: Mechanism Repositioning Based on Integrative Pharmacology: Anti-Inflammatory Effect of Safflower in Myocardial Ischemia–Reperfusion Injury
Source: MDPI journal article supplement (doi:10.3390/ijms24065313), 2023-03-10
Supplement: s1 [file s1]

## The mRNA levels of PI3K and HIF1 $\alpha$

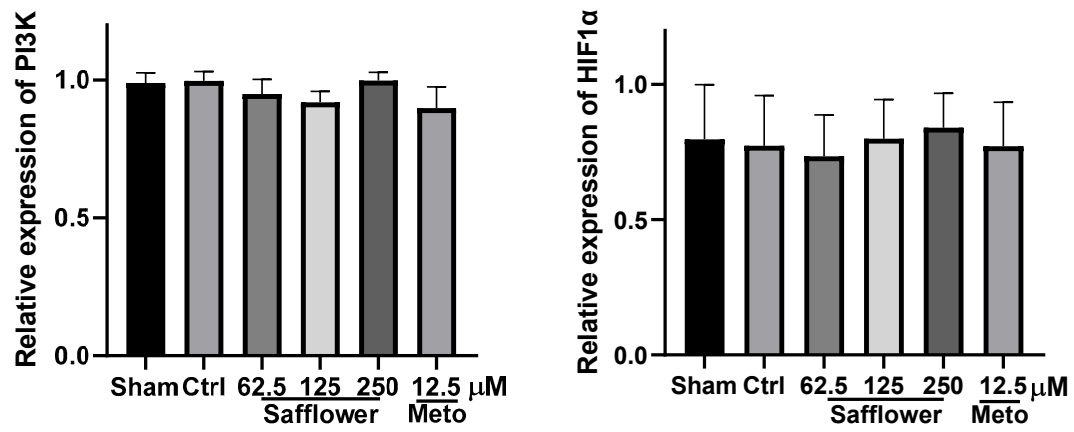

**Supplementary figure S1.** The expression of mRNA levels of PI3K and HIF1 $\alpha$

Values are means  $\pm$  SEM,  $^*P < 0.05$ ,  $^{**}P < 0.01$ ,  $^{***}P < 0.001$  vs. sham, respectively;  $^*P < 0.05$ ,  $^{**}P < 0.01$ ,  $^{***}P < 0.001$  vs. Control, respectively; One-way ANOVA.
