# Supplementary material for: Mechanism Repositioning Based on Integrative Pharmacology: Anti-Inflammatory Effect of Safflower in Myocardial Ischemia–Reperfusion Injury
Source: MDPI journal article supplement (doi:10.3390/ijms24065313), 2023-03-10
Supplement: s1 [file s1]

| <b>Protein</b> | <b>components</b>                            | <b>binding affinities</b> |
|----------------|----------------------------------------------|---------------------------|
| PRKCA          | rutin                                        | -8.1                      |
|                | 6_Hydroxykaempferol 3_Rutinoside_6_glucoside | -11.2                     |
|                | 6_Hydroxykaempferol                          | -9.1                      |
|                | Apigenin                                     | -9.1                      |
|                | Baicalin                                     | -9.9                      |
|                | Eriodictyol                                  | -9.4                      |
|                | Hydroxysafflor yellow A                      | -7.8                      |
|                | Kaempferol                                   | -9.2                      |
|                | Luteolin                                     | -9.5                      |
|                | quercetin                                    | -9.7                      |
|                | Rutin                                        | -8.1                      |
| PIK3CG         | Eriodictyol                                  | -8.0                      |
|                | Hydroxysafflor yellow A.                     | -5.9                      |
|                | Kaempferol                                   | -7.6                      |
|                | Luteolin                                     | -7.8                      |
|                | quercetin                                    | -7.7                      |
|                | Rutin                                        | -9.0                      |
| AKT1           | Eriodictyol                                  | -8.3                      |
|                | Hydroxysafflor yellow A.                     | -7.7                      |
|                | Kaempferol                                   | -7.5                      |
|                | Luteolin                                     | -8.4                      |
|                | quercetin                                    | -8.1                      |
|                | Rutin                                        | -9.2                      |
