# Supplementary material for: Mechanism Repositioning Based on Integrative Pharmacology: Anti-Inflammatory Effect of Safflower in Myocardial Ischemia–Reperfusion Injury
Source: MDPI journal article supplement (doi:10.3390/ijms24065313), 2023-03-10
Supplement: s1 [file s1]

**Tabel S1. Identifying the components in ESI<sup>+</sup> mode**

| NO. | Component name                                     | Formula                                                       | Theoretical (m/z) | Observed (m/z) | Mass error (ppm) | tR (min) | Response | Adducts | Ion fragment                                                                                                                                                                               |
|-----|----------------------------------------------------|---------------------------------------------------------------|-------------------|----------------|------------------|----------|----------|---------|--------------------------------------------------------------------------------------------------------------------------------------------------------------------------------------------|
| 1   | Vanillic acid                                      | C <sub>8</sub> H <sub>8</sub> O <sub>4</sub>                  | 168.0423          | 169.0754       | -3.9             | 0.57     | 14781    | +H      | 95.0457[M+H-CH <sub>3</sub> O-CHO <sub>2</sub> ]                                                                                                                                           |
| 2   | Serotobenine                                       | C <sub>20</sub> H <sub>18</sub> N <sub>2</sub> O <sub>4</sub> | 350.1267          | 351.1358       | -1.7             | 1.18     | 5902     | +H      | 337.1384[M+H-NH]/166.0710[M+H-C <sub>9</sub> H <sub>9</sub> N <sub>2</sub> O]/156.0726[M+H-C <sub>9</sub> H <sub>8</sub> O <sub>3</sub> ]                                                  |
| 3   | N-(m-coumaroyl) tryptamine                         | C <sub>19</sub> H <sub>18</sub> N <sub>2</sub> O <sub>2</sub> | 306.1368          | 329.1250       | -3.3             | 1.33     | 6529     | +Na     | 146.0594[M+H-C <sub>10</sub> H <sub>8</sub> N-OH]/130.0498[M+H-C <sub>10</sub> H <sub>9</sub> N <sub>2</sub> -OH]/121.0645[M+H-C <sub>11</sub> H <sub>10</sub> ON <sub>2</sub> ]/          |
| 4   | Roseoside                                          | C <sub>19</sub> H <sub>30</sub> O <sub>8</sub>                | 386.1941          | 409.1813       | -4.8             | 1.57     | 40101    | +Na     | 175.1178[M+H-OGlc-OH-CH <sub>3</sub> ]/144.1119[M+H-OGlc-C <sub>2</sub> H <sub>2</sub> O-OH]                                                                                               |
| 5   | Tracheloside                                       | C <sub>27</sub> H <sub>34</sub> O <sub>12</sub>               | 550.2050          | 551.2148       | 4.6              | 1.62     | 6049     | +H      | 451.1397[M+H-C <sub>2</sub> H <sub>6</sub> O <sub>2</sub> -2OH]/322.0539[M+H-2OH-CH <sub>3</sub> O]/284.0983[M+H-C <sub>14</sub> H <sub>16</sub> O <sub>5</sub> ]                          |
| 6   | Quercetin-3-O-β-D-glucoside                        | C <sub>21</sub> H <sub>20</sub> O <sub>12</sub>               | 464.0955          | 465.1025       | -0.4             | 2.12     | 509532   | +H      | 296.0987[M+H-C <sub>6</sub> O <sub>3</sub> H <sub>4</sub> -CH <sub>3</sub> O-OH]/147.0394[[M+H-OGlc-C <sub>6</sub> H <sub>4</sub> O <sub>3</sub> -OH]                                      |
| 7   | D-Phenylalanine                                    | C <sub>9</sub> H <sub>11</sub> NO <sub>2</sub>                | 165.0790          | 166.0856       | -4               | 2.23     | 388345   | +H      | 120.0805[M-COOH]/91.0539[M+H-C <sub>2</sub> H <sub>4</sub> NO <sub>2</sub> ]                                                                                                               |
| 8   | 6-hydroxykaempferol-6,7-O-β-D-glucoside            | C <sub>27</sub> H <sub>30</sub> O <sub>17</sub>               | 626.1483          | 627.1547       | -1.5             | 2.26     | 32122    | +H      | 465.1028[M+H-Rha]/451.1413[M+H-C <sub>9</sub> H <sub>6</sub> O <sub>3</sub> -OH]                                                                                                           |
| 9   | Chlorogenic acid                                   | C <sub>16</sub> H <sub>18</sub> O <sub>9</sub>                | 354.0951          | 377.1599       | -1.2             | 3.34     | 76853    | +Na     | 201.0458[M+H-C <sub>8</sub> H <sub>7</sub> O <sub>2</sub> -OH]/137.0595[M+H-C <sub>7</sub> H <sub>8</sub> O <sub>7</sub> ]                                                                 |
| 10  | N-[2-(5-Hydroxy-1H-indol-3-yl)ethyl]-p-coumaramide | C <sub>19</sub> H <sub>18</sub> N <sub>2</sub> O <sub>3</sub> | 322.1317          | 323.1300       | 2.3              | 3.37     | 5239     | +H      | 156.0765[M+H-C <sub>9</sub> H <sub>7</sub> O <sub>2</sub> ]/147.0438[M+Na-C <sub>10</sub> H <sub>11</sub> ON <sub>2</sub> ]/119.4924[M+H-C <sub>11</sub> H <sub>11</sub> ON <sub>2</sub> ] |

|    |                                                                |                                                               |           |           |      |      |         |     |                                                                                                                                        |
|----|----------------------------------------------------------------|---------------------------------------------------------------|-----------|-----------|------|------|---------|-----|----------------------------------------------------------------------------------------------------------------------------------------|
| 11 | Flavanonol                                                     | C <sub>15</sub> H <sub>12</sub> O <sub>3</sub>                | 240.0786  | 241.1117  | -2.8 | 3.61 | 5943    | +H  | 167.0723[M+H-C <sub>6</sub> H <sub>4</sub> ]/147.0432[M+H-C <sub>6</sub> H <sub>4</sub> -OH]                                           |
| 12 | 1-(O-2,4,6-trimethoxyphenyl)-6-(O-galloyl)-β-D-glucopyranoside | C <sub>22</sub> H <sub>26</sub> O <sub>13</sub>               | 498.1373  | 499.0982  | -4.3 | 4.18 | 6287    | +H  | 451.1129[M+H-2OH-CH <sub>3</sub> ]/433.1125[M+H-3OH-CH <sub>3</sub> ]/267.0958[M+H-C <sub>9</sub> H <sub>11</sub> O <sub>4</sub> -3OH] |
| 13 | Saffloquinoside B                                              | C <sub>33</sub> H <sub>36</sub> O <sub>17</sub>               | 704.1953  | 705.1819  | -3   | 4.41 | 20533   | +H  | 461.1065[M+H-Rha-C <sub>6</sub> H <sub>5</sub> O]/299.0544[M+H-Glc-Rha]/287.0544[M+H-Glc-Rha-C <sub>6</sub> H <sub>5</sub> O-OH]       |
| 14 | N-feruloyltryptamine                                           | C <sub>20</sub> H <sub>20</sub> N <sub>2</sub> O <sub>3</sub> | 336.1474  | 337.1818  | 1.7  | 4.52 | 9541    | +H  | 188.0702[M+H-C <sub>8</sub> H <sub>7</sub> N-OH]/147.0437[M+H-C <sub>10</sub> H <sub>10</sub> N <sub>2</sub> ]                         |
| 15 | Saffloquinoside C                                              | C <sub>27</sub> H <sub>32</sub> O <sub>17</sub>               | 628.1640  | 629.1696  | -2.5 | 4.56 | 178326  | +H  | 467.1180[M+H-Glc]/367.0997[M+H-Glc-C <sub>7</sub> H <sub>6</sub> O]                                                                    |
| 16 | 6-Hydroxykaempferol-3,6,7-triglucoside                         | C <sub>33</sub> H <sub>40</sub> O <sub>22</sub>               | 788.2011  | 789.2061  | -2.9 | 5.09 | 692995  | +H  | 627.1546[M+H-Glc]/465.1026[M+H-2Glc]/303.0495[M+H-3Glc]                                                                                |
| 17 | Hydroxysafflower yellow A                                      | C <sub>27</sub> H <sub>32</sub> O <sub>16</sub>               | 612.1690  | 613.1753  | -1.7 | 5.24 | 4210682 | +H  | 451.1235[M+H-Glc]/433.1127[M+H-Glc-OH]                                                                                                 |
| 18 | Safflower yellow B                                             | C <sub>48</sub> H <sub>54</sub> O <sub>27</sub>               | 1062.2853 | 1063.2894 | -2.9 | 5.86 | 60993   | +H  | 737.1863[M+H-Glc-C <sub>9</sub> H <sub>7</sub> O <sub>2</sub> -OH]/575.1391[M+H-2Glc-C <sub>9</sub> H <sub>7</sub> O <sub>2</sub> -OH] |
| 19 | Lirioresional A                                                | C <sub>21</sub> H <sub>24</sub> O <sub>8</sub>                | 404.1471  | 427.1627  | 1.4  | 5.97 | 29101   | +Na | 213.1220[M+H-C <sub>10</sub> H <sub>10</sub> O <sub>5</sub> ]/167.6272[M+H-C <sub>11</sub> H <sub>11</sub> O <sub>5</sub> ]            |
| 20 | Scutellarin                                                    | C <sub>21</sub> H <sub>18</sub> O <sub>12</sub>               | 462.0798  | 463.0870  | -0.1 | 6.53 | 27192   | +H  | 287.0546[M+H-C <sub>6</sub> H <sub>9</sub> O <sub>6</sub> ]/271.0585[M+H-C <sub>6</sub> H <sub>9</sub> O <sub>7</sub> ]                |
| 21 | Naringenin                                                     | C <sub>15</sub> H <sub>12</sub> O <sub>5</sub>                | 272.0685  | 273.0752  | -1.9 | 6.61 | 24611   | +H  | 179.0332[M+H-C <sub>6</sub> H <sub>5</sub> O]                                                                                          |

|    |                                                           |                                                 |          |          |      |      |         |     |                                                                                                                               |
|----|-----------------------------------------------------------|-------------------------------------------------|----------|----------|------|------|---------|-----|-------------------------------------------------------------------------------------------------------------------------------|
| 22 | (E)-Ferulic acid                                          | C <sub>10</sub> H <sub>10</sub> O <sub>4</sub>  | 194.0579 | 195.0647 | -2.6 | 7.11 | 11053   | +H  | 177.0542[M+H-H <sub>2</sub> O]/149.5932[M+H-CHO <sub>2</sub> ]                                                                |
| 23 | Eriodictyol                                               | C <sub>15</sub> H <sub>12</sub> O <sub>6</sub>  | 288.0634 | 289.0705 | -0.4 | 7.31 | 306217  | +H  | 147.0438[M+H-OH-C <sub>6</sub> H <sub>4</sub> O <sub>3</sub> ]/119.0488[M+H-OH-C <sub>7</sub> H <sub>4</sub> O <sub>4</sub> ] |
| 24 | (2S)-4',5-dihydroxyl-6,7-di-O-β-D-giucopyanosyl flavanone | C <sub>27</sub> H <sub>32</sub> O <sub>16</sub> | 612.1690 | 635.1579 | -0.5 | 7.32 | 206914  | +Na | 595.1659[M-OH]/433.1129[M+H-Glc]/289.0705[M+H-2Glc]/147.0438[M+H-2Glc-C <sub>8</sub> H <sub>5</sub> O <sub>2</sub> ]          |
| 25 | Myricetin                                                 | C <sub>15</sub> H <sub>10</sub> O <sub>8</sub>  | 318.0376 | 319.0445 | -1.2 | 7.77 | 41466   | +H  | 193.4080[M+H-C <sub>6</sub> H <sub>5</sub> O <sub>3</sub> ]/152.0030[M-H-C <sub>8</sub> H <sub>6</sub> O <sub>4</sub> ]       |
| 26 | 6-Hydroxykaempferol 3-Rutinoside-6-glucoside              | C <sub>33</sub> H <sub>40</sub> O <sub>21</sub> | 772.2062 | 773.2117 | -2.3 | 8.24 | 1113254 | +H  | 627.1546[M+H-Rha]/465.1025[M+H-Rha-Glc]/303.0494[M+H-Rha-2Glc]                                                                |
| 27 | 6-hydroxykaempferol 3,6-diglucoside                       | C <sub>27</sub> H <sub>30</sub> O <sub>17</sub> | 626.1483 | 627.1543 | -2   | 8.29 | 1492252 | +H  | 465.4025[M+H-Glc]/303.0494[M+H-2Glc]                                                                                          |
| 28 | 6-hydroxyapigenin -6-O-β-D-glucoside-7-O-β-D-glucuronide  | C <sub>27</sub> H <sub>28</sub> O <sub>17</sub> | 624.1327 | 625.1389 | -1.7 | 8.4  | 727220  | +H  | 463.0868[M+H-Glc]/287.0544[M+H-Glc-C <sub>6</sub> H <sub>12</sub> O <sub>6</sub> ]                                            |
| 29 | Saffomin C                                                | C <sub>30</sub> H <sub>30</sub> O <sub>15</sub> | 630.1585 | 631.1636 | -3.5 | 8.42 | 27087   | +H  | 564.1703[M+H-4OH]/402.1175[M+H-OGlc-3OH]/287.0544[M+H-OGlc-C <sub>9</sub> H <sub>8</sub> O <sub>3</sub> ]                     |
| 30 | Safflower yellow A                                        | C <sub>27</sub> H <sub>30</sub> O <sub>16</sub> | 610.1534 | 611.1596 | -1.8 | 8.47 | 166592  | +H  | 449.1075[M+H-Glc]/433.1122[M+H-OGlc]/247.0229[M+H-OGlc-C <sub>9</sub> H <sub>7</sub> O <sub>2</sub> ]                         |

|    |                                                                          |                                                               |          |          |      |       |         |     |                                                                                                                                                                                                      |
|----|--------------------------------------------------------------------------|---------------------------------------------------------------|----------|----------|------|-------|---------|-----|------------------------------------------------------------------------------------------------------------------------------------------------------------------------------------------------------|
| 31 | Scopoletin                                                               | C <sub>10</sub> H <sub>8</sub> O <sub>4</sub>                 | 192.0423 | 193.0489 | -3.4 | 8.5   | 67667   | +H  | 178.0253[M+H-CH <sub>3</sub> ]                                                                                                                                                                       |
| 32 | Saffloquinoside<br>A                                                     | C <sub>27</sub> H <sub>30</sub> O <sub>15</sub>               | 594.1585 | 617.1463 | -2.3 | 8.8   | 26961   | +Na | 433.1115[M+H-Glc]/287.0541[M+H-Glc-<br>C <sub>6</sub> H <sub>7</sub> O <sub>4</sub> ]                                                                                                                |
| 33 | Rutin                                                                    | C <sub>27</sub> H <sub>30</sub> O <sub>16</sub>               | 610.1534 | 611.1604 | -0.4 | 9.35  | 732202  | +H  | 465.1030[M+H-Rha]/303.0498[M+H-<br>Glc-Rha]                                                                                                                                                          |
| 34 | Yellow pigment<br>A                                                      | C <sub>26</sub> H <sub>28</sub> O <sub>16</sub>               | 596.1377 | 597.1703 | -2   | 9.35  | 11390   | +H  | 303.0498[M+H-OGlc-2OH-<br>C <sub>6</sub> H <sub>5</sub> O]/169.0125[M+H-2Glc-C <sub>8</sub> H <sub>7</sub> O]                                                                                        |
| 35 | 6-Hydroxykaempferol                                                      | C <sub>15</sub> H <sub>10</sub> O <sub>7</sub>                | 302.0427 | 303.0497 | -0.8 | 9.47  | 1375662 | +H  | 287.0547[M-OH]/169.0127[M+H-<br>C <sub>8</sub> H <sub>5</sub> O <sub>2</sub> ]                                                                                                                       |
| 36 | 6-hydroxykaempferol-3-O-β-D-glucoside                                    | C <sub>21</sub> H <sub>20</sub> O <sub>12</sub>               | 464.0955 | 465.1030 | 0.6  | 9.47  | 776885  | +H  | 449.1077[M-OH]/303.0497[M+H-<br>Glc]/287.0547[M+H-<br>OGlc]/169.0127[M+H-OGlc-C <sub>8</sub> H <sub>5</sub> O]                                                                                       |
| 37 | Kaempferol-3-O-sophoroside                                               | C <sub>27</sub> H <sub>30</sub> O <sub>16</sub>               | 610.1534 | 633.1414 | -2   | 9.49  | 93981   | +Na | 303.0497[M+H-Glc-<br>C <sub>6</sub> H <sub>7</sub> O <sub>3</sub> ]/287.0547[M+H-2Glc]                                                                                                               |
| 38 | N,N'-[2,2'-(5,5-dihydroxy-4,4'-bi-1H-indol-3,3'-yl)diethyl]-diferulamide | C <sub>38</sub> H <sub>32</sub> N <sub>4</sub> O <sub>6</sub> | 640.2322 | 663.2187 | -3.6 | 10.1  | 55258   | +Na | 477.1937[M+H-C <sub>9</sub> H <sub>7</sub> O <sub>2</sub> -<br>OH]/238.0700[M+H-C <sub>6</sub> H <sub>5</sub> O-C <sub>9</sub> H <sub>7</sub> O <sub>2</sub> -<br>C <sub>10</sub> H <sub>8</sub> ON] |
| 39 | 6-hydroxykaempferol-7-O-glucoside                                        | C <sub>21</sub> H <sub>20</sub> O <sub>12</sub>               | 464.0955 | 465.1032 | 1    | 10.48 | 13422   | +H  | 287.0545[M+H-Glc]                                                                                                                                                                                    |
| 40 | Quercetin                                                                | C <sub>15</sub> H <sub>10</sub> O <sub>7</sub>                | 302.0427 | 303.0497 | -0.6 | 10.66 | 233661  | +H  | 285.0398[M+H-H <sub>2</sub> O]/153.0176[M+H-<br>C <sub>8</sub> H <sub>5</sub> O <sub>3</sub> ]                                                                                                       |
| 41 | Carthamone                                                               | C <sub>21</sub> H <sub>20</sub> O <sub>11</sub>               | 448.1006 | 449.1077 | -0.3 | 10.76 | 24840   | +H  | 169.0125[M+H-Glc-C <sub>8</sub> H <sub>7</sub> O]                                                                                                                                                    |

|    |                                                |                                                    |           |           |      |       |         |     |                                                                                                                                                                                                    |
|----|------------------------------------------------|----------------------------------------------------|-----------|-----------|------|-------|---------|-----|----------------------------------------------------------------------------------------------------------------------------------------------------------------------------------------------------|
| 42 | Syringin                                       | C <sub>17</sub> H <sub>24</sub> O <sub>9</sub>     | 372.1420  | 395.1318  | 1.3  | 11.59 | 24058   | +Na | 191.0674[M+H-Glc-OH]/137.0595[M+H-OGlc-C <sub>3</sub> H <sub>5</sub> O]                                                                                                                            |
| 43 | kaempferol-3-O- $\beta$ -rutinoside            | C <sub>27</sub> H <sub>30</sub> O <sub>15</sub>    | 594.1585  | 595.1656  | -0.3 | 12.17 | 1177687 | +H  | 287.0548[M+H-2Glc]/153.0178[M+H-2Glc-C <sub>8</sub> H <sub>5</sub> O]                                                                                                                              |
| 44 | Kaempferol                                     | C <sub>15</sub> H <sub>10</sub> O <sub>6</sub>     | 286.0477  | 287.0548  | -0.6 | 12.17 | 876007  | +H  | 153.0178[M+H-C <sub>8</sub> H <sub>5</sub> O <sub>2</sub> ]                                                                                                                                        |
| 45 | Luteolin 5-glucoside                           | C <sub>21</sub> H <sub>20</sub> O <sub>11</sub>    | 448.1006  | 449.1088  | 2.1  | 12.17 | 241475  | +H  | 443.1129[M+H-OH]/287.0548[M+H-Glc]/153.0178[M+H-Glc-C <sub>8</sub> H <sub>5</sub> O <sub>2</sub> ]                                                                                                 |
| 46 | 6-hydroxyapigenin                              | C <sub>15</sub> H <sub>10</sub> O <sub>6</sub>     | 286.0477  | 287.0547  | -0.9 | 12.52 | 338578  | +H  | 193.0126[M+H-C <sub>6</sub> H <sub>5</sub> O]/147.0437[M+H-C <sub>6</sub> H <sub>3</sub> O <sub>4</sub> ]                                                                                          |
| 47 | Anhydrosafflor yellow B                        | C <sub>48</sub> H <sub>52</sub> O <sub>26</sub>    | 1044.2747 | 1045.2801 | -1.7 | 12.53 | 3589900 | +H  | 883.2274[M+H-Glc]/721.1749[M+H-2Glc]                                                                                                                                                               |
| 48 | Kaempferol-3-O-D-galactoside                   | C <sub>21</sub> H <sub>20</sub> O <sub>11</sub>    | 448.1006  | 471.0891  | -1.5 | 12.6  | 16213   | +Na | 271.0587[M+H-OGlc]                                                                                                                                                                                 |
| 49 | 6-methoxykaempferol                            | C <sub>16</sub> H <sub>12</sub> O <sub>7</sub>     | 316.0583  | 317.0652  | -1.1 | 12.78 | 503109  | +H  | 302.0415[M+H-CH <sub>3</sub> ]/287.0543[M+H-CH <sub>3</sub> -OH]                                                                                                                                   |
| 50 | 6-(Aminomethyl)-3-methyl-flavone hydrochloride | C <sub>17</sub> H <sub>16</sub> ClN O <sub>2</sub> | 301.0870  | 302.0515  | 4.2  | 12.78 | 5042    | +H  | 173.5222[M+H-C <sub>6</sub> H <sub>5</sub> -NH <sub>3</sub> ]/121.0277[M+H-C <sub>9</sub> H <sub>8</sub> -CH <sub>3</sub> N]                                                                       |
| 51 | Baicalin                                       | C <sub>21</sub> H <sub>18</sub> O <sub>11</sub>    | 446.0849  | 447.0923  | 0.3  | 13.08 | 73419   | +H  | 271.0593[M+H-C <sub>6</sub> H <sub>8</sub> O <sub>6</sub> ]/169.0124[M+H-C <sub>6</sub> H <sub>8</sub> O <sub>6</sub> -C <sub>7</sub> H <sub>6</sub> ]                                             |
| 52 | Dihydrochalcone                                | C <sub>15</sub> H <sub>14</sub> O                  | 210.1045  | 211.1201  | 0.7  | 14.66 | 17149   | +H  | 91.0539[M+H-C <sub>8</sub> H <sub>7</sub> O]/77.0382[M+H-C <sub>9</sub> H <sub>9</sub> O]                                                                                                          |
| 53 | Saffloquinoside E                              | C <sub>30</sub> H <sub>34</sub> O <sub>15</sub>    | 634.1898  | 657.1799  | 1.3  | 15.21 | 6176    | +Na | 529.1637[M+H-OH-CH <sub>3</sub> O-C <sub>2</sub> H <sub>3</sub> O <sub>2</sub> ]/471.1249[M+H-Glc]/371.0652[M+H-Glc-C <sub>6</sub> H <sub>5</sub> O-C <sub>2</sub> H <sub>3</sub> O <sub>2</sub> ] |

|    |                                                 |                                                                |          |          |      |       |         |     |                                                                                                                                                                                                                                                                                                    |
|----|-------------------------------------------------|----------------------------------------------------------------|----------|----------|------|-------|---------|-----|----------------------------------------------------------------------------------------------------------------------------------------------------------------------------------------------------------------------------------------------------------------------------------------------------|
| 54 | Kaempferol3-O-caffeoyl-sophoroside7-O-glucoside | C <sub>42</sub> H <sub>46</sub> O <sub>24</sub>                | 934.2379 | 957.2270 | -0.2 | 16.71 | 873179  | +Na | 667.2118[M+H-C <sub>27</sub> H <sub>39</sub> O <sub>19</sub> ]/569.1070[M+H-C <sub>24</sub> H <sub>25</sub> O <sub>16</sub> ]/449.0500[M+H-C <sub>23</sub> H <sub>13</sub> O <sub>10</sub> ]/289.0700[M+H-C <sub>15</sub> H <sub>13</sub> O <sub>6</sub> ]                                         |
| 55 | Luteolin                                        | C <sub>15</sub> H <sub>10</sub> O <sub>6</sub>                 | 286.0477 | 287.0544 | -2   | 16.75 | 90094   | +H  | 153.0176[M+H-C <sub>8</sub> H <sub>6</sub> O <sub>2</sub> ]                                                                                                                                                                                                                                        |
| 56 | Carthamin                                       | C <sub>43</sub> H <sub>42</sub> O <sub>22</sub>                | 910.2168 | 933.2025 | -3.8 | 16.75 | 30531   | +Na | 569.1070[M+H-2Glc-OH]/437.7508[M+H-2Glc-C <sub>8</sub> H <sub>7</sub> O-OH]                                                                                                                                                                                                                        |
| 57 | N1,N5,N10-(Z)-tri-p-coumaroylspermidine         | C <sub>34</sub> H <sub>37</sub> N <sub>3</sub> O <sub>6</sub>  | 583.2682 | 584.2753 | -0.4 | 18.44 | 2740807 | +H  | 438.2391[M+H-C <sub>25</sub> H <sub>32</sub> N <sub>3</sub> O <sub>4</sub> ]/420.2283[M+H-C <sub>25</sub> H <sub>30</sub> N <sub>3</sub> O <sub>3</sub> ]/275.1754[M+H-C <sub>16</sub> H <sub>23</sub> N <sub>2</sub> O <sub>2</sub> ]/147.0437[M+H-C <sub>9</sub> H <sub>7</sub> O <sub>2</sub> ] |
| 58 | Apigenin                                        | C <sub>15</sub> H <sub>10</sub> O <sub>5</sub>                 | 270.0528 | 271.0598 | -0.9 | 18.63 | 175455  | +H  | 119.0488[M+H-C <sub>7</sub> H <sub>4</sub> O <sub>4</sub> ]/153.0779[M+H-C <sub>8</sub> H <sub>6</sub> O]                                                                                                                                                                                          |
| 59 | Tinctormine                                     | C <sub>9</sub> H <sub>12</sub> N <sub>6</sub> O <sub>4</sub> S | 300.0641 | 301.0705 | -2.8 | 19.09 | 54821   | +H  | 286.4679[M+H-CH <sub>3</sub> ]/168.0046[M+H-C <sub>4</sub> H <sub>6</sub> O <sub>3</sub> N-NH <sub>2</sub> ]/140.0989[M+H-C <sub>4</sub> H <sub>6</sub> O <sub>3</sub> N-CH <sub>2</sub> ON]                                                                                                       |
| 60 | Palmitic acid                                   | C <sub>16</sub> H <sub>32</sub> O <sub>2</sub>                 | 256.2402 | 257.2737 | -1.4 | 22.63 | 33846   | +H  | 201.0458[M+H-C <sub>3</sub> H <sub>5</sub> O <sub>2</sub> ]                                                                                                                                                                                                                                        |
| 61 | 9,11-Octadecadienoic acid,13-oxo-,(9Z,11E)-     | C <sub>18</sub> H <sub>30</sub> O <sub>3</sub>                 | 294.2195 | 295.2264 | -1.3 | 22.67 | 36974   | +H  | 277.2147[M+H-H <sub>2</sub> O]                                                                                                                                                                                                                                                                     |

**Tabel 2. Identifying the components in ESI<sup>+</sup> mode**

| NO. | Component name       | Formula                                                       | Theoretical (m/z) | Observed (m/z) | Mass error (ppm) | tR (min) | Response | Adducts | Ion fragment                                                                                                                                                                       |
|-----|----------------------|---------------------------------------------------------------|-------------------|----------------|------------------|----------|----------|---------|------------------------------------------------------------------------------------------------------------------------------------------------------------------------------------|
| 1   | N-feruloyltryptamine | C <sub>20</sub> H <sub>20</sub> N <sub>2</sub> O <sub>3</sub> | 336.1474          | 381.1185       | 4.6              | 0.6      | 9653     | +HCOO   | 191.0555[M-H-C <sub>10</sub> H <sub>10</sub> N]/179.0552[M-H-C <sub>10</sub> H <sub>10</sub> N-CH <sub>3</sub> ]/161.0450[M-H-C <sub>10</sub> H <sub>10</sub> N-OCH <sub>3</sub> ] |

|    |                                        |                                                  |          |          |      |      |         |       |                                                                                                                                                                  |
|----|----------------------------------------|--------------------------------------------------|----------|----------|------|------|---------|-------|------------------------------------------------------------------------------------------------------------------------------------------------------------------|
| 2  | Saffloquinoside D                      | C <sub>27</sub> H <sub>34</sub> O <sub>18</sub>  | 646.1745 | 645.1671 | -0.2 | 1.24 | 5154    | -H    | 447.0737[M-H-Glc]/285.0396[M-H-2Glc]/243.0292[M-H-C <sub>3</sub> H <sub>2</sub> O-2Glc]/165.9898[M-H-2Glc-C <sub>8</sub> H <sub>8</sub> O]                       |
| 3  | D-Phenylalanine                        | C <sub>9</sub> H <sub>11</sub> NO <sub>2</sub>   | 165.0790 | 164.0711 | -3.4 | 2.38 | 61110   | -H    | 147.0445[M-H-NH <sub>2</sub> ]/103.0549[M-H-NH <sub>3</sub> -CHO <sub>2</sub> ]                                                                                  |
| 4  | Quercetin-3,7-O-β-D-glucopyranoside    | C <sub>27</sub> H <sub>30</sub> O <sub>17</sub>  | 626.1483 | 625.1411 | 0.2  | 3.06 | 90228   | -H    | 565.1206[M-H-C <sub>2</sub> H <sub>4</sub> O <sub>2</sub> ]/417.0827[M-H-Glc-CH <sub>2</sub> O]                                                                  |
| 5  | Esculetin                              | C <sub>9</sub> H <sub>6</sub> O <sub>4</sub>     | 178.0266 | 223.0241 | -3.3 | 3.56 | 6240    | +HCOO | 153.0188[M-H-C <sub>2</sub> H <sub>2</sub> ]/125.0236[M-H-C <sub>3</sub> H <sub>2</sub> O]                                                                       |
| 6  | Cartormin                              | C <sub>27</sub> H <sub>29</sub> NO <sub>13</sub> | 575.1639 | 574.1521 | -0.2 | 3.81 | 75518   | -H    | 353.0873[M-H-GLC-C <sub>2</sub> H <sub>4</sub> O <sub>2</sub> ]/123.0083[M-H-C <sub>6</sub> H <sub>5</sub> O-C <sub>9</sub> H <sub>9</sub> O <sub>4</sub> N-Glc] |
| 7  | Saffloquinoside C                      | C <sub>27</sub> H <sub>32</sub> O <sub>17</sub>  | 628.1640 | 627.1571 | 0.7  | 4.56 | 547978  | -H    | 609.1458[M-H-H <sub>2</sub> O]/419.0981[M-H-RhaO-CH <sub>2</sub> O-OH]/299.0555[M-H-RhaO-OGlc]/205.0136[M-H-ORha-OGlc-C <sub>6</sub> H <sub>5</sub> O]           |
| 8  | Chlorogenic acid                       | C <sub>16</sub> H <sub>18</sub> O <sub>9</sub>   | 354.0951 | 353.0879 | 0.2  | 5.06 | 207654  | -H    | 191.5549[M-H-C <sub>9</sub> H <sub>7</sub> O <sub>3</sub> ]/135.0447[M-H-C <sub>8</sub> H <sub>8</sub> O <sub>7</sub> ]                                          |
| 9  | Saffloquinoside E                      | C <sub>30</sub> H <sub>34</sub> O <sub>15</sub>  | 634.1898 | 679.1884 | 0.6  | 5.06 | 14462   | +HCOO | 566.1386[M-H-2OH-CH <sub>2</sub> O]/375.0694[M-H-Glc-C <sub>6</sub> H <sub>5</sub> O]                                                                            |
| 10 | 6-Hydroxykaempferol-3,6,7-triglucoside | C <sub>33</sub> H <sub>40</sub> O <sub>22</sub>  | 788.2011 | 787.1941 | 0.3  | 5.09 | 1060464 | -H    | 625.1415[M-H-Glc]/463.0883[M-H-2Glc]                                                                                                                             |
| 11 | Hydroxysafflower yellow A              | C <sub>27</sub> H <sub>32</sub> O <sub>18</sub>  | 644.1589 | 643.1504 | -1.8 | 5.24 | 20327   | -H    | 625.1400[M-H-H <sub>2</sub> O]/283.2329[M-H-2OGlc]                                                                                                               |
| 12 | Syringin                               | C <sub>17</sub> H <sub>24</sub> O <sub>9</sub>   | 372.1420 | 417.1399 | -0.8 | 5.26 | 63484   | +HCOO | 189.0544[M-H-Glc-OH]/145.2916[M-H-Glc-OCH <sub>3</sub> -CH <sub>2</sub> O]                                                                                       |
| 13 | Roseoside                              | C <sub>19</sub> H <sub>30</sub> O <sub>8</sub>   | 386.1941 | 431.1921 | -0.5 | 6.58 | 276186  | +HCOO | 205.1224[M-H-OGlc]/189.0809[M-H-                                                                                                                                 |

|    |                                                              |                                                 |          |          |      |      |         |       |                                                                                                                                                                    |
|----|--------------------------------------------------------------|-------------------------------------------------|----------|----------|------|------|---------|-------|--------------------------------------------------------------------------------------------------------------------------------------------------------------------|
|    |                                                              |                                                 |          |          |      |      |         |       | OGlc-OH]/165.0921[M-H-Glc-C <sub>2</sub> H <sub>4</sub> O-OH]                                                                                                      |
| 14 | Yellow pigment A                                             | C <sub>26</sub> H <sub>28</sub> O <sub>16</sub> | 596.1377 | 641.1362 | 0.4  | 6.88 | 40053   | +HCOO | 431.0974[M-H-Rha]/287.0551[M-H-Rha-Glc]                                                                                                                            |
| 15 | Cartorimine                                                  | C <sub>15</sub> H <sub>14</sub> O <sub>6</sub>  | 290.0790 | 335.0769 | -1.1 | 6.95 | 17349   | +HCOO | 255.0652[M-H-2OH]/143.0321[M-H-C <sub>3</sub> H <sub>2</sub> O-C <sub>6</sub> H <sub>5</sub> O]/135.0446[M-H-CHO <sub>2</sub> -OH-C <sub>6</sub> H <sub>5</sub> O] |
| 16 | Saffloquinoside A                                            | C <sub>27</sub> H <sub>30</sub> O <sub>15</sub> | 594.1585 | 639.1560 | -1   | 7.28 | 62056   | +HCOO | 449.1086[M-H-Rha-CH <sub>2</sub> ]/287.0552[M-H-Glc-Rha-CH <sub>2</sub> ]                                                                                          |
| 17 | 6-hydroxykaempferol-3,6,7-O-β-D-glucoside                    | C <sub>34</sub> H <sub>42</sub> O <sub>21</sub> | 786.2219 | 785.2136 | -1.3 | 7.41 | 21628   | -H    | 623.1259[M-H-Glc]/447.0948[M-H-O-2Glc]/300.2636[M-H-3Glc]                                                                                                          |
| 18 | 5,6,7,4'-tetrahydroxyisoflavone-6,7-di-O-β-D-glucopyranoside | C <sub>27</sub> H <sub>32</sub> O <sub>16</sub> | 612.1690 | 611.1618 | 0    | 7.66 | 2701286 | -H    | 286.0478[M-H-2Glc]/119.0500[M-H-2OGlc-C <sub>7</sub> HO <sub>3</sub> ]                                                                                             |
| 19 | kaempferol-3-O-β-rutinoside                                  | C <sub>27</sub> H <sub>30</sub> O <sub>15</sub> | 594.1585 | 593.1512 | 0.1  | 7.74 | 124561  | -H    | 365.0664[M-H-ORha-3OH]/192.0052[M-H-O2Rha-C <sub>6</sub> H <sub>5</sub> O]                                                                                         |
| 20 | Hexacosanoic acid                                            | C <sub>26</sub> H <sub>52</sub> O <sub>2</sub>  | 396.3967 | 441.3948 | -0.3 | 7.84 | 23594   | +HCOO | 85.0287[M-H-C <sub>22</sub> H <sub>45</sub> ]                                                                                                                      |
| 21 | 6-hydroxykaempferol-6,7-O-β-D-glucoside                      | C <sub>27</sub> H <sub>30</sub> O <sub>17</sub> | 626.1483 | 625.1411 | 0.1  | 8.1  | 66919   | -H    | 463.0880[M-H-Rha]/301.0350[M-H-Glc-Rha]                                                                                                                            |
| 22 | 6-Hydroxykaempferol 3-Rutinoside-6-glucoside                 | C <sub>33</sub> H <sub>40</sub> O <sub>21</sub> | 772.2062 | 771.1992 | 0.3  | 8.24 | 1632678 | -H    | 625.1407[M-H-Glc]/463.0873[M-H-Glc-Rha]/301.0346[M-H-2Glc-Rha]/271.0242[M-H-ORha-Glc-C <sub>6</sub> H <sub>2</sub> O <sub>3</sub> -OH]                             |



|    |                                                         |                                                 |          |          |      |      |         |       |                                                                                                                                                                                                                                           |
|----|---------------------------------------------------------|-------------------------------------------------|----------|----------|------|------|---------|-------|-------------------------------------------------------------------------------------------------------------------------------------------------------------------------------------------------------------------------------------------|
| 23 | 6-hydroxyapigenin-3,6-2-O-β-D-Glucoside                 | C <sub>27</sub> H <sub>30</sub> O <sub>17</sub> | 626.1483 | 625.1406 | -0.7 | 8.29 | 1960279 | -H    | 609.1460[M-OH]/463.0873[M-H-Glc]/301.0346[M-H-2Glc]                                                                                                                                                                                       |
| 24 | 6-hydroxyapigenin-6-O-β-D-glucoside-7-O-β-D-glucuronide | C <sub>27</sub> H <sub>28</sub> O <sub>17</sub> | 624.1327 | 623.1252 | -0.3 | 8.4  | 597063  | -H    | 447.0929[M-H-C <sub>6</sub> H <sub>9</sub> O <sub>6</sub> ]/285.0398[M-H-Glc-C <sub>6</sub> H <sub>9</sub> O <sub>6</sub> ]/136.9874[M-H-C <sub>6</sub> H <sub>9</sub> O <sub>6</sub> -Glc-C <sub>9</sub> H <sub>6</sub> O <sub>2</sub> ] |
| 25 | Carthamone                                              | C <sub>21</sub> H <sub>20</sub> O <sub>11</sub> | 448.1006 | 447.0930 | -0.7 | 8.4  | 64935   | -H    | 285.0398[M-H-Glc]/136.9874[M-H-Glc-C <sub>7</sub> H <sub>7</sub> O <sub>2</sub> ]                                                                                                                                                         |
| 26 | 6-hydroxyapigenin                                       | C <sub>15</sub> H <sub>10</sub> O <sub>6</sub>  | 286.0477 | 285.0396 | -3.2 | 8.4  | 10447   | -H    | 227.0290[M-H-OH]/165.9897[-H-C <sub>8</sub> H <sub>6</sub> O]/117.0338[M-H-C <sub>7</sub> H <sub>4</sub> O <sub>5</sub> ]                                                                                                                 |
| 27 | Saffomin C                                              | C <sub>30</sub> H <sub>30</sub> O <sub>15</sub> | 630.1585 | 629.1507 | -0.8 | 8.42 | 45465   | -H    | 562.1550[M-H-4OH]/447.0929[M-H-C <sub>9</sub> H <sub>8</sub> O <sub>3</sub> ]/284.0318[M-H-Glc-C <sub>9</sub> H <sub>8</sub> O <sub>3</sub> ]                                                                                             |
| 28 | Safflower yellow A                                      | C <sub>27</sub> H <sub>30</sub> O <sub>16</sub> | 610.1534 | 609.1459 | -0.3 | 8.47 | 140923  | -H    | 381.6110[M-H-OGlc-CH <sub>2</sub> O-OH]/283.0244[M-H-2Glc]/187.3904[M-H-2Glc-C <sub>4</sub> H <sub>2</sub> O <sub>3</sub> ]                                                                                                               |
| 29 | Kaempferol-3-O-β-D-xyloside                             | C <sub>20</sub> H <sub>18</sub> O <sub>10</sub> | 418.0900 | 463.1037 | -0.4 | 9.05 | 201973  | +HCOO | 253.0491[M-H-OGlc-OH]/145.0286[M-H-OGlc-C <sub>6</sub> H <sub>4</sub> O <sub>3</sub> ]                                                                                                                                                    |
| 30 | Kaempferol-3-O-sophoroside                              | C <sub>27</sub> H <sub>30</sub> O <sub>16</sub> | 610.1534 | 609.1458 | -0.5 | 9.35 | 1378148 | -H    | 301.0347[M-H-Glc-C <sub>6</sub> H <sub>5</sub> O-2OH]/271.0243[M-H-OGlc-C <sub>6</sub> H <sub>4</sub> O <sub>3</sub> -CH <sub>2</sub> O]                                                                                                  |
| 31 | 6-hydroxykaempferol-7-O-glucoside                       | C <sub>21</sub> H <sub>20</sub> O <sub>12</sub> | 464.0955 | 463.0877 | -1   | 9.47 | 1767272 | -H    | 301.0344[M-H-Glc]                                                                                                                                                                                                                         |
| 32 | 6-Hydroxykaempferol                                     | C <sub>15</sub> H <sub>10</sub> O <sub>7</sub>  | 302.0427 | 301.0343 | -3.6 | 9.47 | 23703   | -H    | 284.0320[M-H-OH]/139.0283[M-H-C <sub>9</sub> H <sub>6</sub> O <sub>3</sub> ]                                                                                                                                                              |

|    |                                           |                                                 |           |           |      |       |         |       |                                                                                                                                                                                                               |
|----|-------------------------------------------|-------------------------------------------------|-----------|-----------|------|-------|---------|-------|---------------------------------------------------------------------------------------------------------------------------------------------------------------------------------------------------------------|
| 33 | Scutellarin                               | C <sub>21</sub> H <sub>18</sub> O <sub>12</sub> | 462.0798  | 461.0730  | 0.9  | 10.83 | 27085   | -H    | 429.0828[M-H-2OH]/284.0324[M-H-C <sub>6</sub> H <sub>6</sub> O <sub>3</sub> ]                                                                                                                                 |
| 34 | Kaempferol 3-O-<br>β-D-allopyranoside     | C <sub>21</sub> H <sub>20</sub> O <sub>11</sub> | 448.1006  | 447.0932  | -0.1 | 11.2  | 86927   | -H    | 271.0238[M-H-C <sub>6</sub> H <sub>4</sub> O <sub>3</sub> -CH <sub>3</sub> O-OH]/179.0339[M-H-C <sub>6</sub> H <sub>4</sub> O <sub>2</sub> -Glc]                                                              |
| 35 | 6-hydroxykaempferol-3,6-O-β-D-diglucoside | C <sub>22</sub> H <sub>22</sub> O <sub>11</sub> | 462.1162  | 507.1134  | -2   | 11.95 | 55940   | +HCOO | 301.0342[M-H-Glc]/133.0283[M-H-Glc-C <sub>7</sub> H <sub>4</sub> O <sub>5</sub> ]                                                                                                                             |
| 36 | Safflower yellow B                        | C <sub>48</sub> H <sub>54</sub> O <sub>27</sub> | 1062.2853 | 1061.2779 | 0    | 12.18 | 313549  | -H    | 611.1602[M-H-Glc-C <sub>15</sub> H <sub>10</sub> O <sub>6</sub> -OH]/449.1870[M-H-Glc-C <sub>21</sub> H <sub>15</sub> O <sub>11</sub> ]/285.0396[M-H-Glc-C <sub>15</sub> H <sub>10</sub> O <sub>6</sub> -Glc] |
| 37 | Luteolin 5-glucoside                      | C <sub>21</sub> H <sub>20</sub> O <sub>11</sub> | 448.1006  | 447.0932  | -0.1 | 12.53 | 237525  | -H    | 431.0964[M-OH]/286.0478[M-H-Glc]                                                                                                                                                                              |
| 38 | Quercetin-7-O-β-D-glucoside               | C <sub>21</sub> H <sub>20</sub> O <sub>12</sub> | 464.0955  | 463.0885  | 0.6  | 12.67 | 35398   | -H    | 284.0321[M-H-Glc-OH]/146.9652[M-H-Glc-C <sub>8</sub> H <sub>6</sub> O <sub>3</sub> ]                                                                                                                          |
| 39 | Matairesinol-monoglucoside                | C <sub>26</sub> H <sub>32</sub> O <sub>11</sub> | 520.1945  | 565.2085  | 0.3  | 13.06 | 15138   | +HCOO | 324.0996[M-H-Glc-CH <sub>2</sub> O]/281.0805[M-H-Glc-C <sub>2</sub> H <sub>2</sub> O <sub>2</sub> -CH <sub>3</sub> ]                                                                                          |
| 40 | Baicalin                                  | C <sub>21</sub> H <sub>18</sub> O <sub>11</sub> | 446.0849  | 445.0775  | -0.4 | 13.08 | 30948   | -H    | 269.0449[M-H-C <sub>6</sub> H <sub>8</sub> O <sub>6</sub> ]                                                                                                                                                   |
| 41 | Crocin                                    | C <sub>44</sub> H <sub>64</sub> O <sub>24</sub> | 976.3788  | 975.3743  | -4.6 | 14.17 | 23129   | -H    | 615.1684[M-H-2Glc]/487.1794[M-H-C <sub>7</sub> H <sub>10</sub> O <sub>2</sub> -2Glc]                                                                                                                          |
| 42 | Kaempferol                                | C <sub>15</sub> H <sub>10</sub> O <sub>6</sub>  | 286.0477  | 285.0400  | -1.7 | 14.94 | 88959   | -H    | 267.0288[M-H-H <sub>2</sub> O]                                                                                                                                                                                |
| 43 | Carthamin                                 | C <sub>43</sub> H <sub>42</sub> O <sub>22</sub> | 910.2168  | 955.2161  | 1.2  | 16.71 | 2550120 | +HCOO | 461.1085[M+HCOO-GLC-C <sub>15</sub> H <sub>7</sub> O <sub>6</sub> ]/450.1124[M+HCOO-Glc-C <sub>16</sub> H <sub>9</sub> O <sub>6</sub> ]                                                                       |
| 44 | Luteolin                                  | C <sub>15</sub> H <sub>10</sub> O <sub>6</sub>  | 286.0477  | 285.0400  | -1.7 | 16.76 | 73610   | -H    | 132.0210[M-H-C <sub>7</sub> H <sub>4</sub> O <sub>4</sub> ]                                                                                                                                                   |
| 45 | Naringenin                                | C <sub>15</sub> H <sub>12</sub> O <sub>5</sub>  | 272.0685  | 271.0605  | -2.4 | 18.05 | 8048    | -H    | 145.0289[M-H-C <sub>6</sub> H <sub>4</sub> O <sub>3</sub> ]/132.0570[M-H-C <sub>6</sub> H <sub>4</sub> O <sub>3</sub> -OH]/93.0337[M-H-C <sub>9</sub> H <sub>4</sub> O <sub>4</sub> ]                         |

|    |                                                      |                                                                |          |          |      |       |        |       |                                                                                                                                           |
|----|------------------------------------------------------|----------------------------------------------------------------|----------|----------|------|-------|--------|-------|-------------------------------------------------------------------------------------------------------------------------------------------|
| 46 | N1,N5,N10-(Z)-<br>tri-p-cou-<br>maroylspermidin<br>e | C <sub>34</sub> H <sub>37</sub> N <sub>3</sub> O <sub>6</sub>  | 583.2682 | 582.2612 | 0.4  | 18.44 | 869253 | -H    | 462.2030[M-H-C <sub>8</sub> H <sub>7</sub> O]/316.1664[M-H-C <sub>9</sub> H <sub>8</sub> O <sub>2</sub> -C <sub>8</sub> H <sub>7</sub> O] |
| 47 | Apigenin                                             | C <sub>15</sub> H <sub>10</sub> O <sub>5</sub>                 | 270.0528 | 269.0450 | -2.2 | 18.64 | 70120  | -H    | 117.0339[M-H-C <sub>7</sub> H <sub>4</sub> O <sub>4</sub> ]                                                                               |
| 48 | 6-<br>hydroxyapigenin                                | C <sub>15</sub> H <sub>10</sub> O <sub>6</sub>                 | 286.0477 | 285.0398 | -2.2 | 18.86 | 89907  | -H    | 166.9951[M-H-C <sub>8</sub> H <sub>6</sub> O]/145.286[M-H-C <sub>6</sub> H <sub>4</sub> O <sub>4</sub> ]                                  |
| 49 | Tinctormine                                          | C <sub>9</sub> H <sub>12</sub> N <sub>6</sub> O <sub>4</sub> S | 300.0641 | 299.0556 | -4.1 | 19.09 | 23830  | -H    | 271.0602[M-H-NH <sub>2</sub> -N]/183.4349[M-H-C <sub>2</sub> H <sub>4</sub> ON]                                                           |
| 50 | 6-<br>methoxykaempfe<br>rol                          | C <sub>16</sub> H <sub>12</sub> O <sub>7</sub>                 | 316.0583 | 315.0506 | -1.4 | 19.19 | 31599  | -H    | 169.0132[M-H-C <sub>6</sub> H <sub>4</sub> -4OH]                                                                                          |
| 51 | Myristic acid                                        | C <sub>14</sub> H <sub>28</sub> O <sub>2</sub>                 | 228.2089 | 273.2221 | -2.3 | 21.32 | 20045  | +HCOO | 255.2068[M-H-OH]/227.1967[M-H-CHO <sub>2</sub> ]                                                                                          |
